# Supplementary material
Source: PubMed Central journal article supplement (PMC3352560)

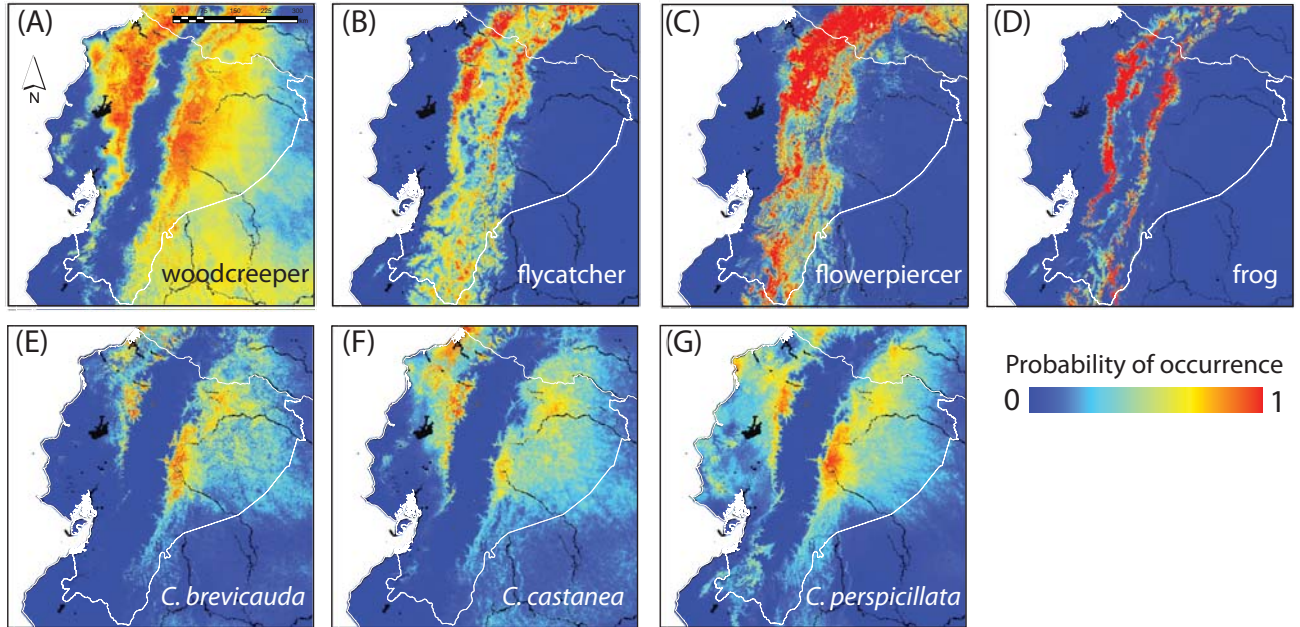

Supplement: eva0004-0397-SD2.pdf [file eva0004-0397-SD2.pdf]

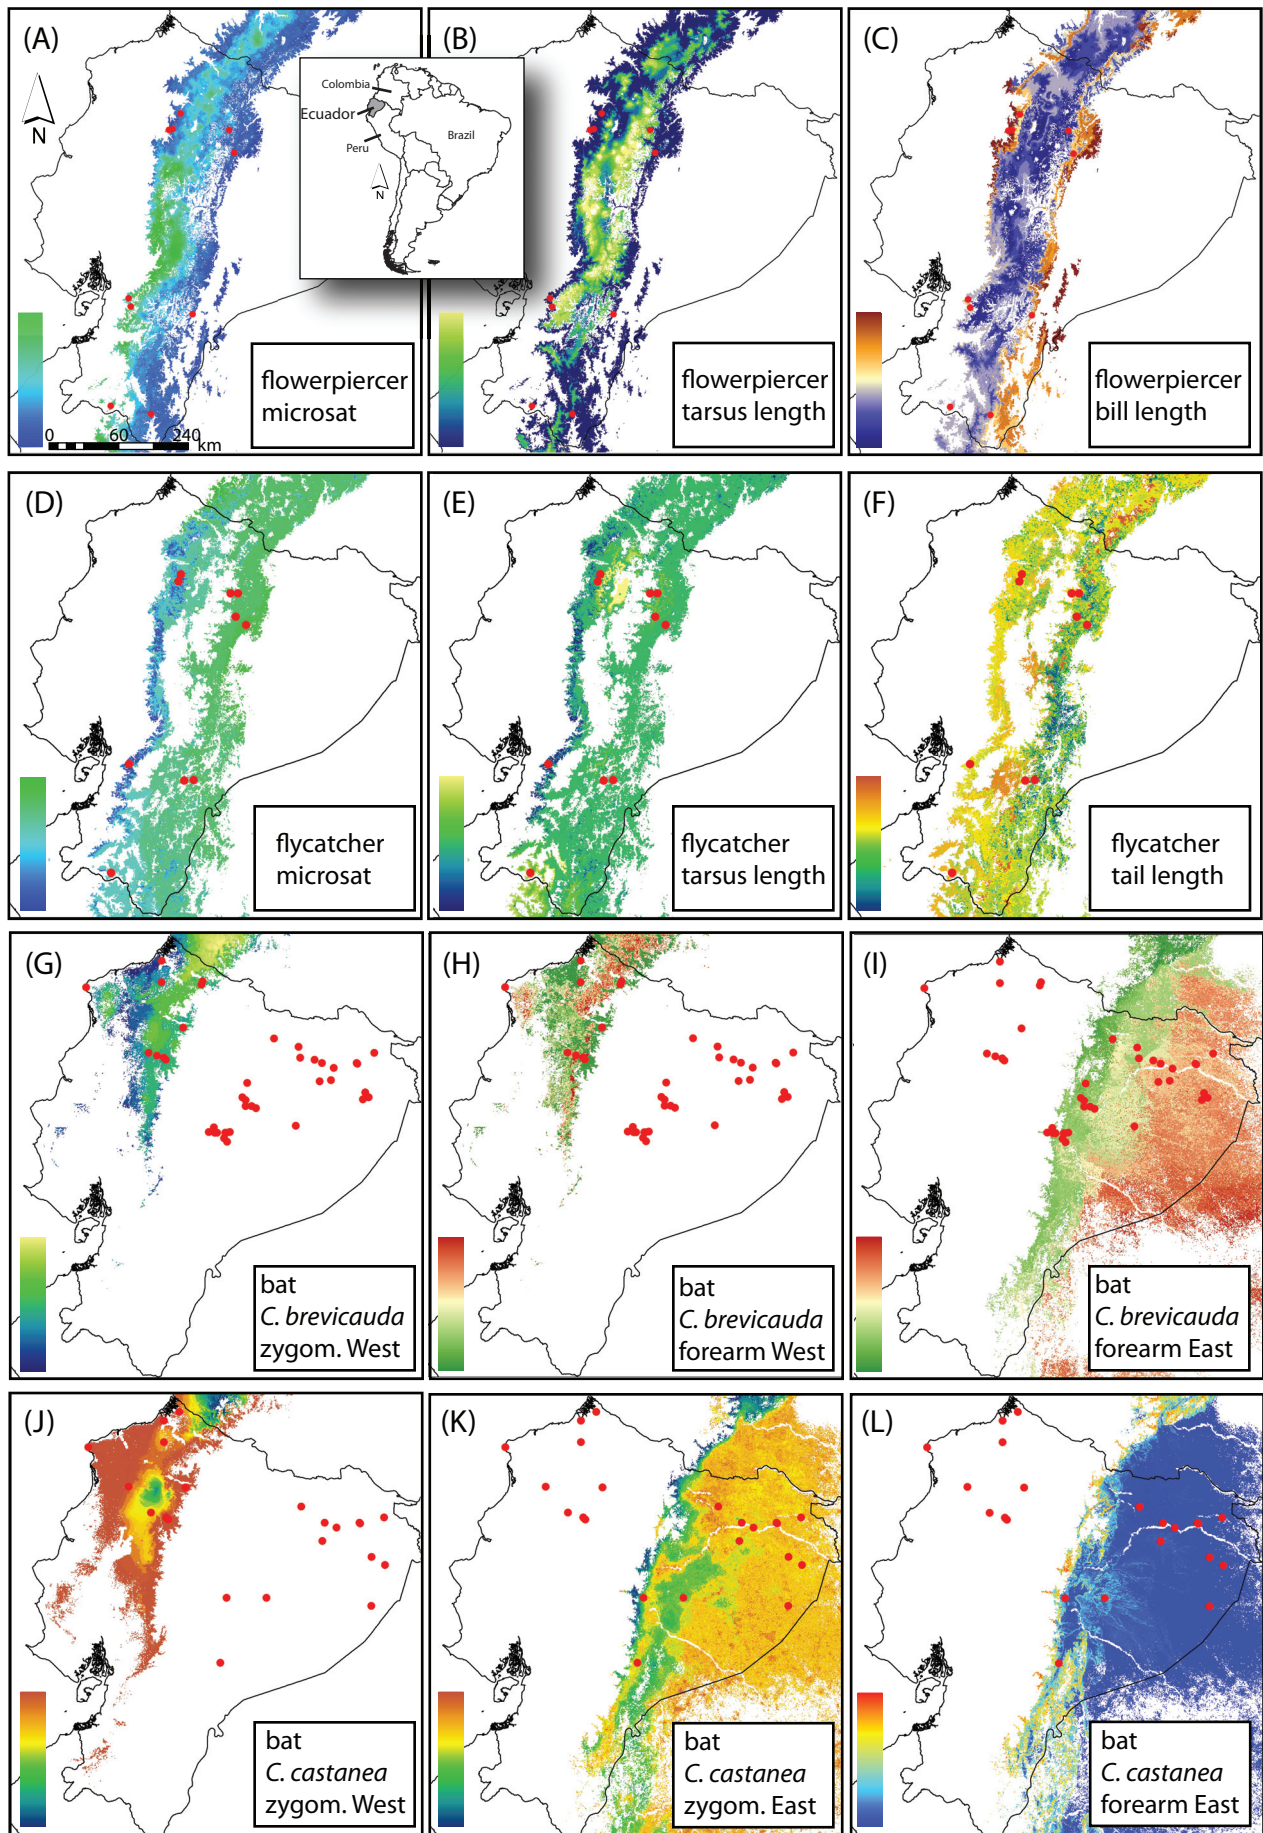

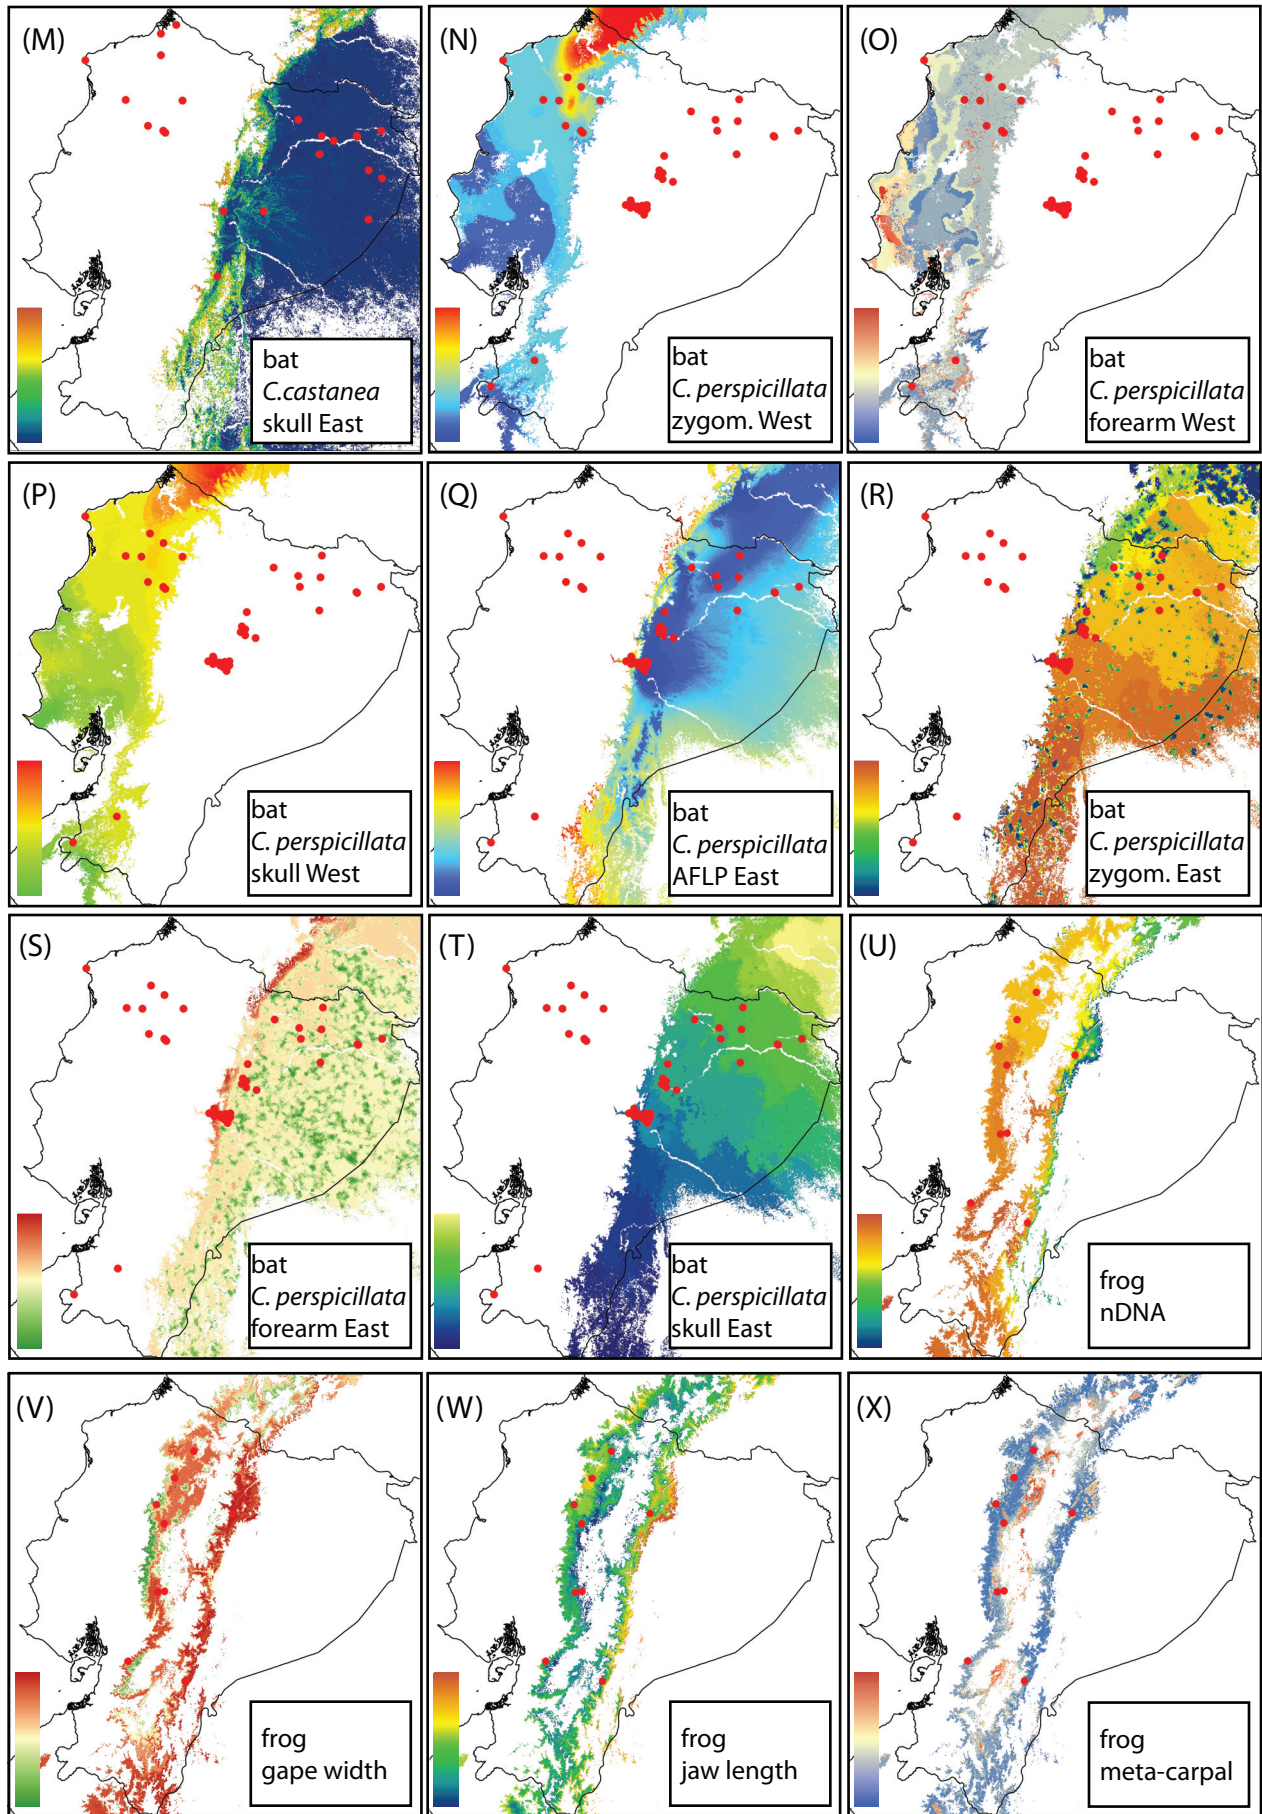

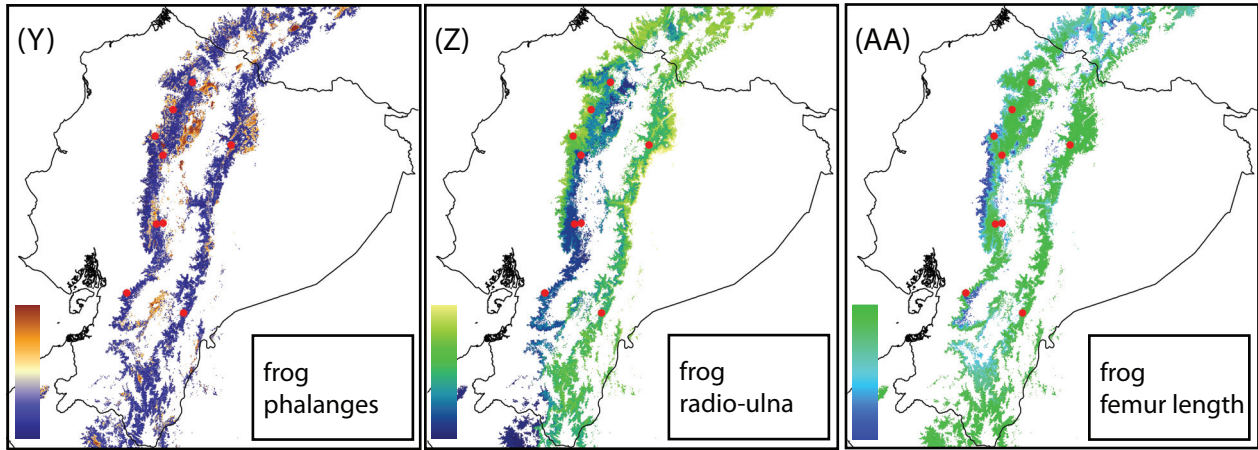

Supplement: eva0004-0397-SD3.pdf [file eva0004-0397-SD3.pdf]

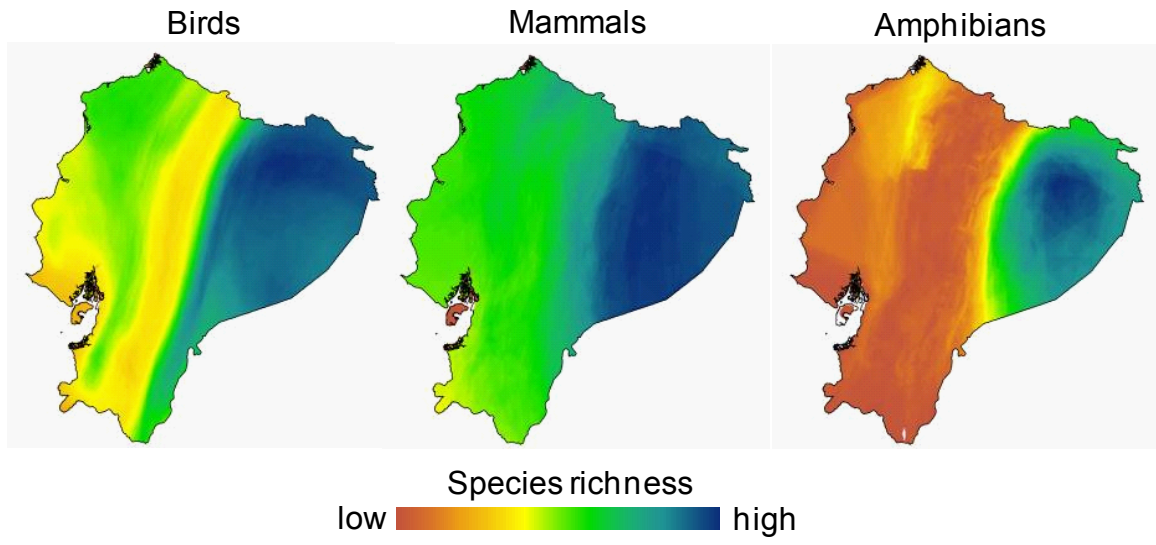

Supplement: eva0004-0397-SD4.pdf [file eva0004-0397-SD4.pdf]

A

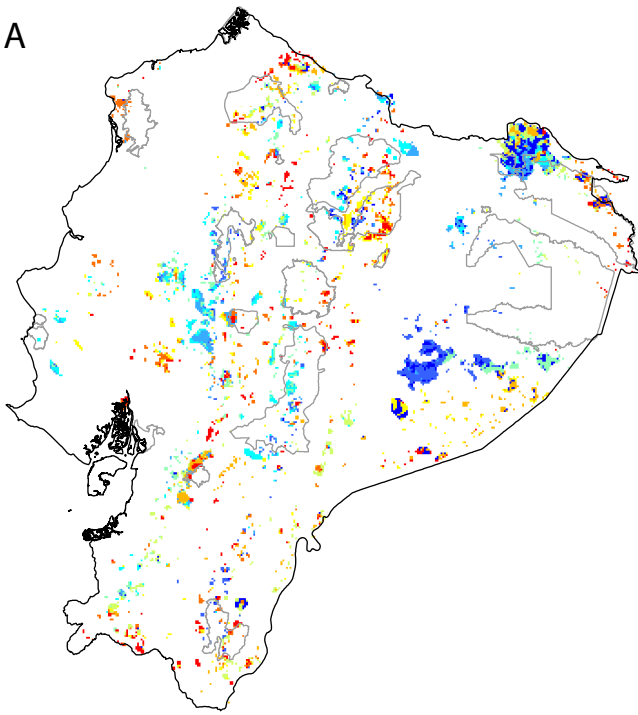

B

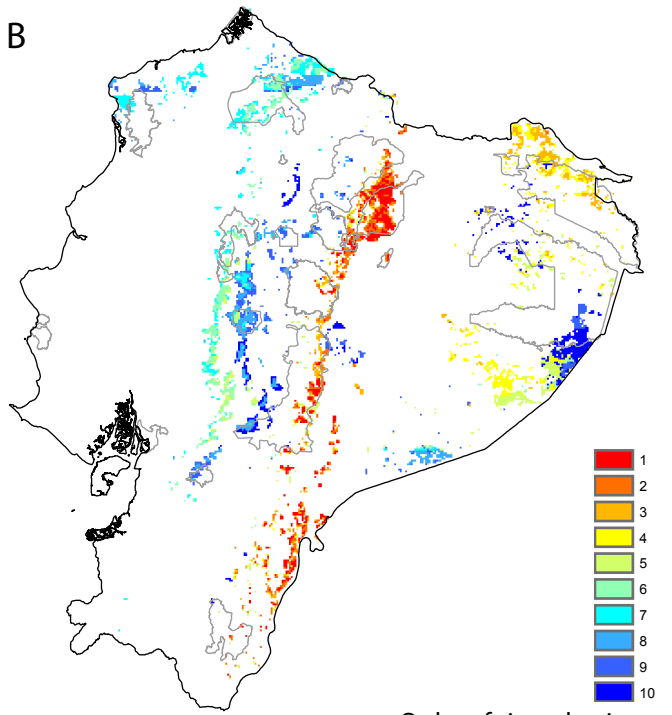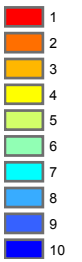

Order of site selection

Supplement: eva0004-0397-SD5.pdf [file eva0004-0397-SD5.pdf]
